# Supplementary material for: Roar: detecting alternative polyadenylation with standard mRNA sequencing libraries
Source: Springer Nature journal article supplement (doi:10.1186/s12859-016-1254-8), 2016-10-18

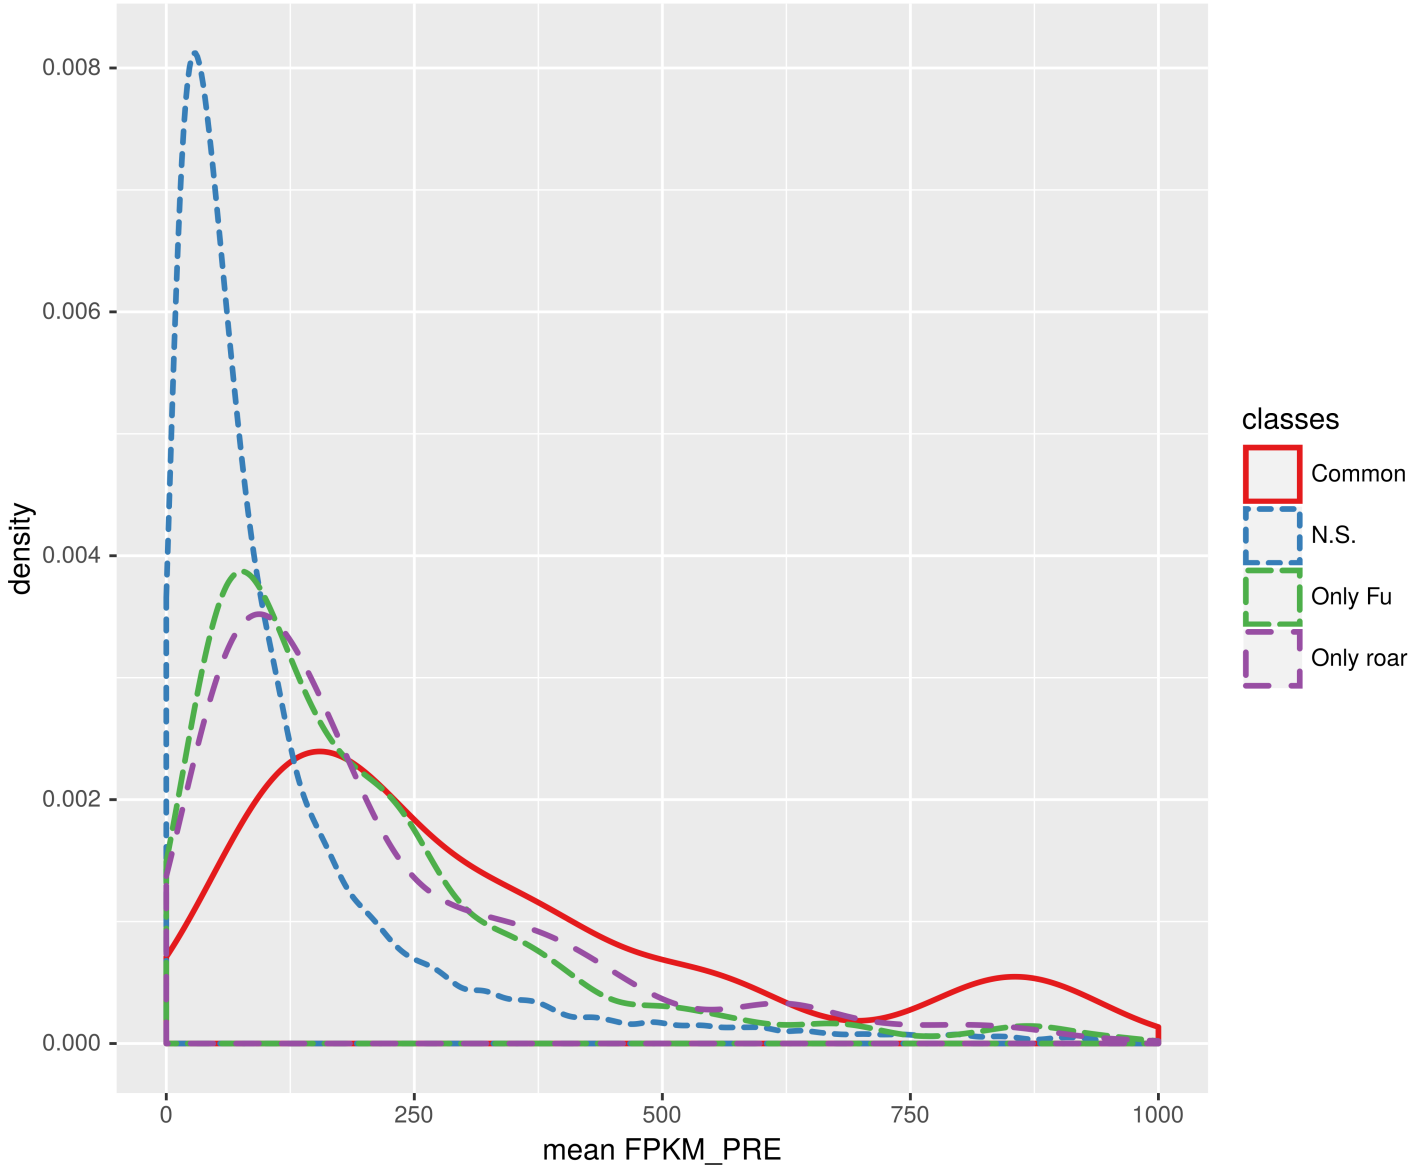

Supplement: 12859_2016_1254_MOESM4_ESM.pdf [file 12859_2016_1254_MOESM4_ESM.pdf]
